# Supplementary material
Source: PubMed Central journal article supplement (PMC7518654)

### Supplemental figures

Fig. S1: Experimental design for atherosclerosis study in *Ldlr*<sup>-/-</sup> mice.

Fig. S2: Hepatic profurin over-expression did not influence, compared with controls: (A) food intake, (B) body weight or (C) liver weight. Data are presented as mean  $\pm$  SD, n =11 mice per group. NS: not significant.

Fig. S3: Liver lipid levels in *Ldlr*<sup>-/-</sup> mice on a Western diet following overexpression of profurin. *Ldlr*<sup>-/-</sup> mice were injected with Ad-null or Ad-profurin, sacrificed on day 28 and the livers collected. (A) TC and (B) TG levels were determined and normalized to total protein. Data are presented as mean  $\pm$  SD, n =11 mice per group. (C) A representative set of H&E stained and (D) Oil red O stained liver sections are shown.

Fig. S4: *Ldlr*<sup>-/-</sup> mice on a chow diet were injected with Ad-null or Ad-profurin, sacrificed on day 3 and the plasma and livers collected. (A) plasma alanine transaminase, (B) liver TC and (C) liver TG. Data are presented as mean  $\pm$  SD, n =4 mice per group. NS: not significant.

# Fig. S1: Experimental design for atherosclerosis study

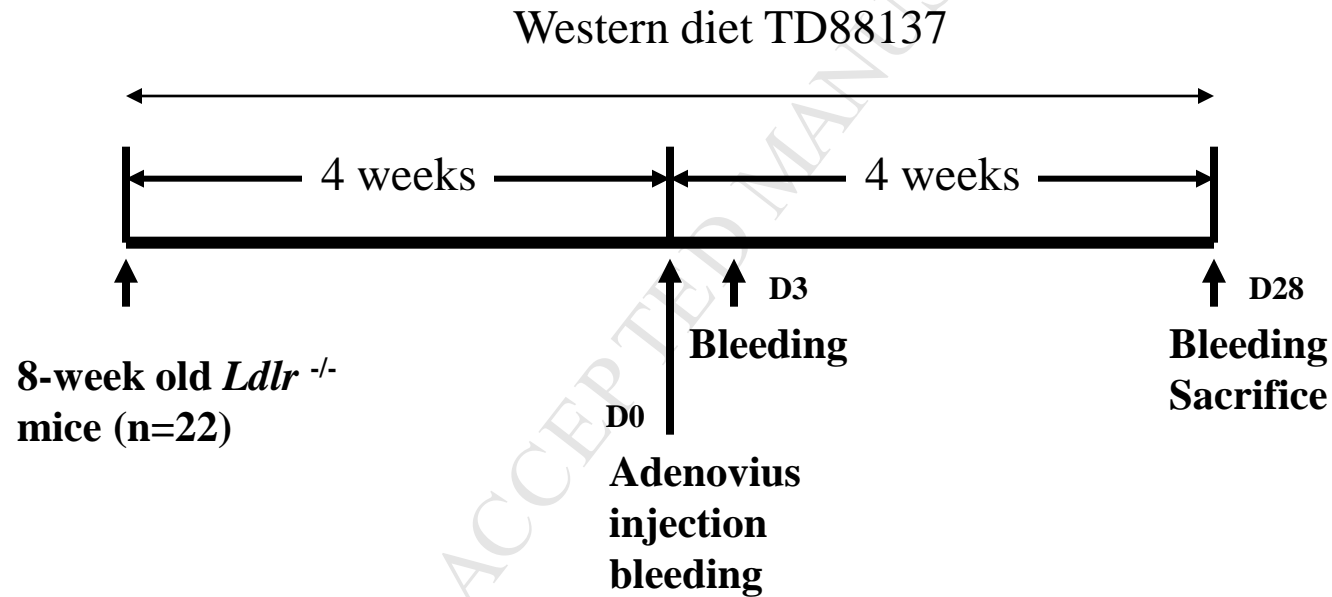

**Fig. S2**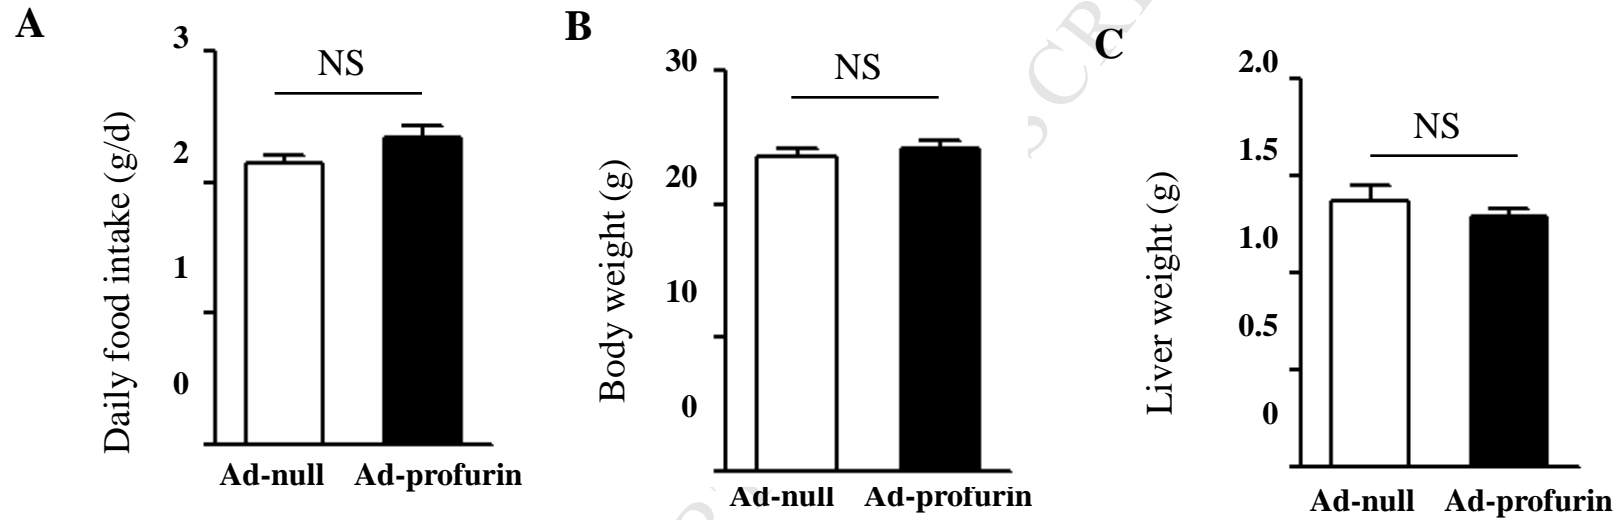

**Fig. S3**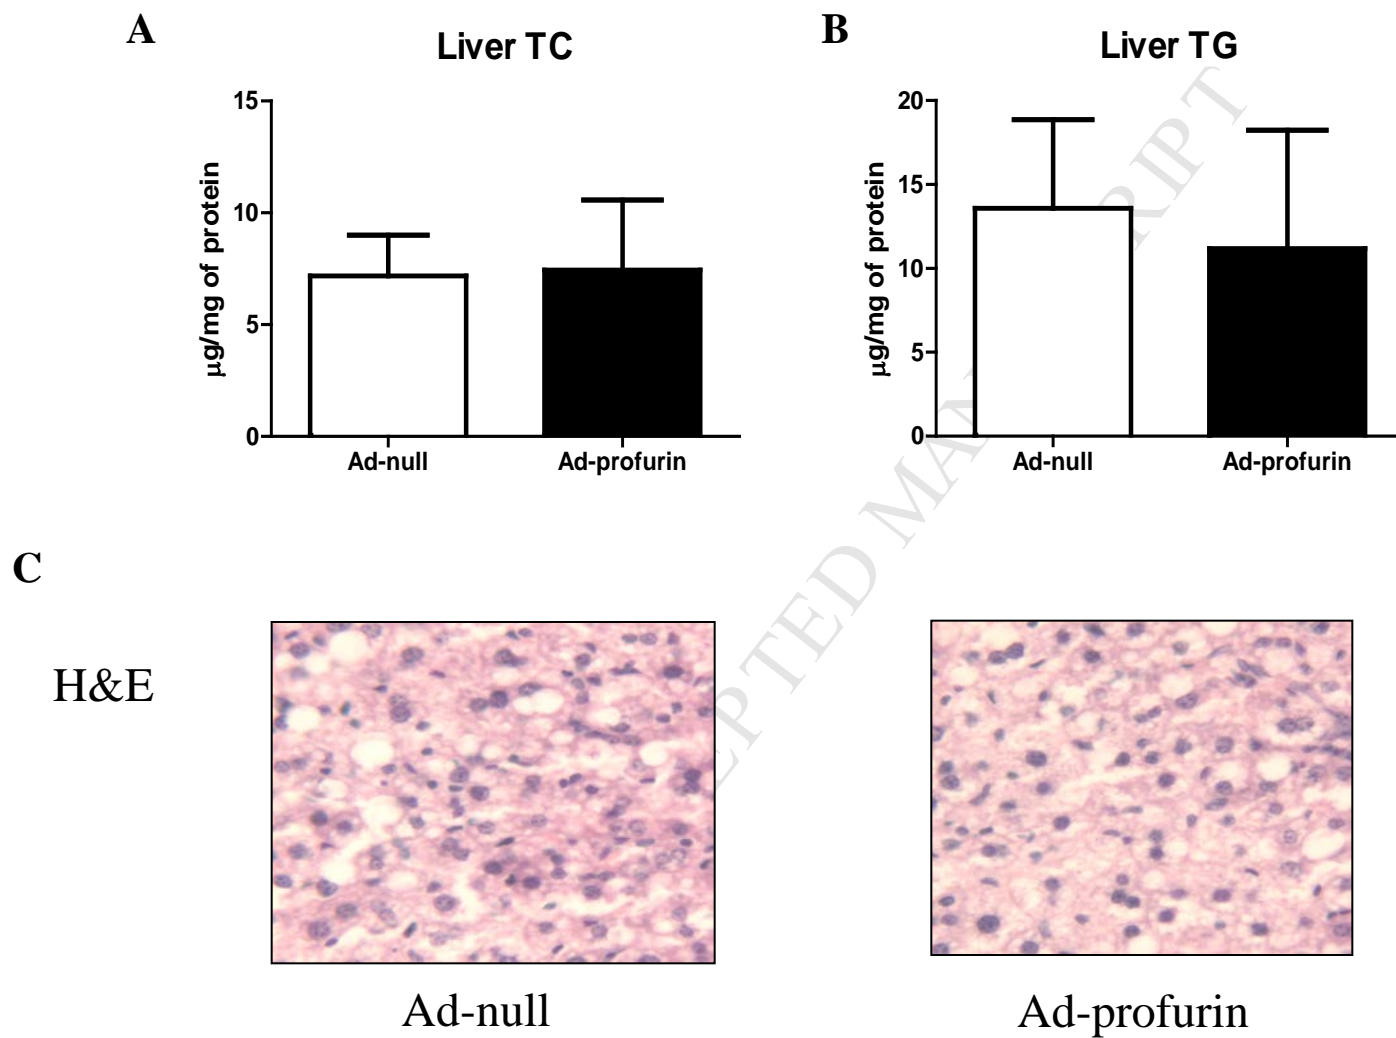

# Fig. S3

D

Oil red O

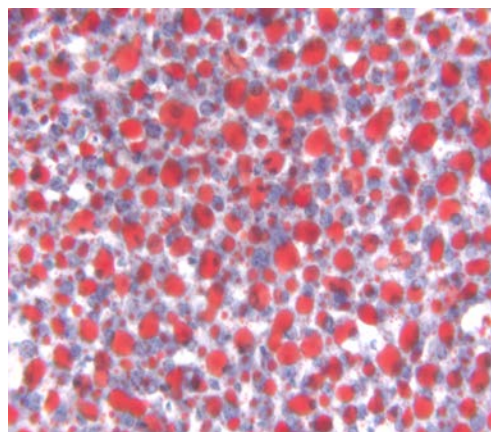

Ad-null

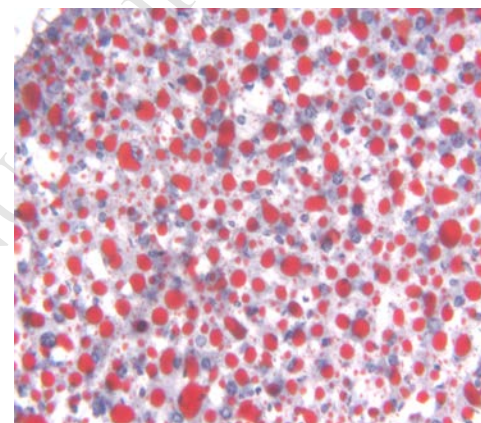

Ad-profurin

**Fig. S4****A**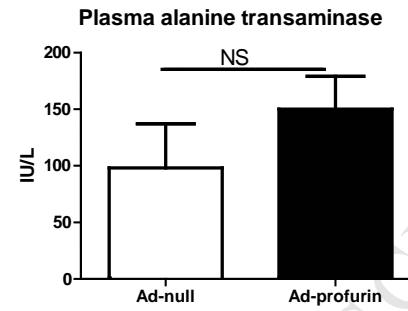**B**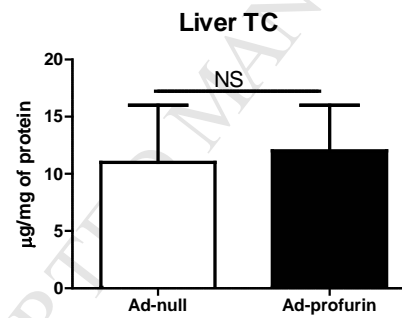**C**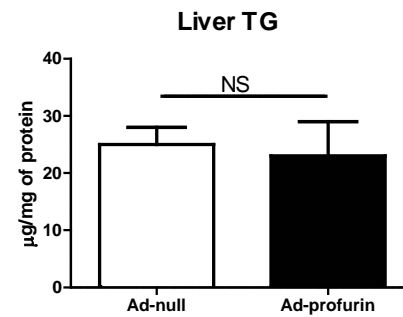

Supplement: NIHMS610923-supplement-01.pdf [file NIHMS610923-supplement-01.pdf]
